# Supplementary material
Source: PubMed Central journal article supplement (PMC3714309)

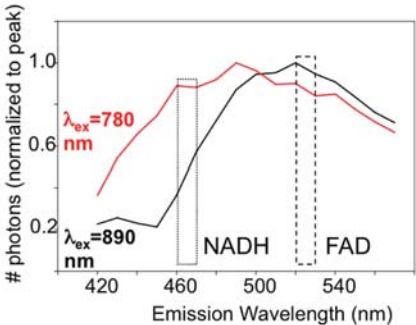

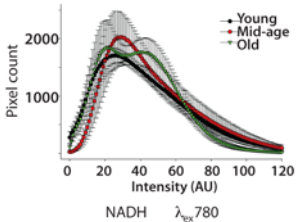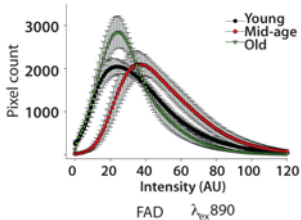

**A**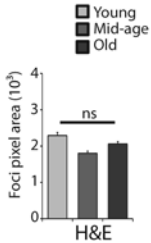**B**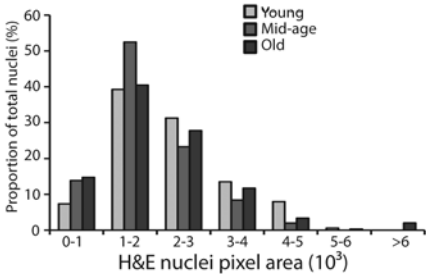

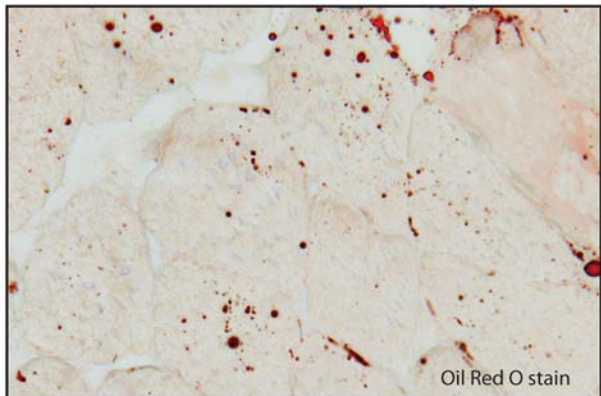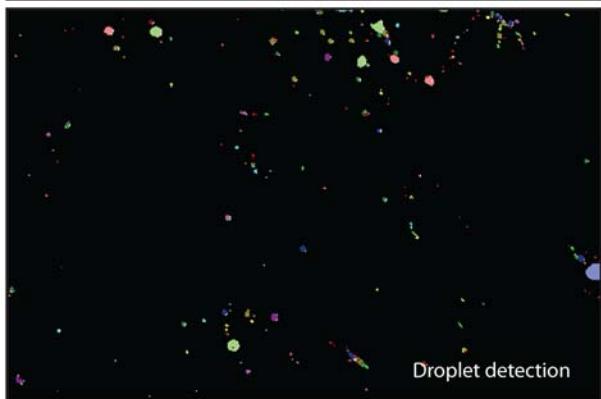

Supplement: NIHMS471914-supplement-Supp_Fig_S1-S4.pdf [file NIHMS471914-supplement-Supp_Fig_S1-S4.pdf]
